# Supplementary material for: Improved efficiency and stability of outdoor and indoor organic photovoltaics with suppressed voltage loss via alkoxylation on dimeric giant acceptors featured as supramolecular stabilizers
Source: Royal Society of Chemistry journal article supplement (doi:10.1039/d5ee00668f), 2025-01-01
Supplement: d5ee00668f1.xlsx [file d5ee00668f1.xlsx]

## Sheet: 工作表1
PM6:BTP-eC9:DYO-V
AM1.5G	27.348			Measure Mode	AC-EQE
AM1.5D	24.361			AM 1.5G	27.348
AM 0	32.393			AM 1.5D	24.361
Lambda(nm)	EQE (%)	SR (A/W)	Jsc (mA/cm^2)	AM 0	32.393
300	0.314	0.001	0	WL-Range	300-1000nm
310	0.064	0	0	Date/Time	07-23_11-07-31
320	0.002	0	0	Spent Seconds	114
330	18.893	0.05	0.009
340	28.187	0.077	0.028
350	34.854	0.098	0.042
360	39.141	0.114	0.056
370	40.255	0.12	0.075
380	41.108	0.126	0.084
390	44.883	0.141	0.085
400	51.885	0.167	0.116
410	60.076	0.199	0.211
420	69.043	0.234	0.26
430	77.915	0.27	0.299
440	85.358	0.303	0.345
450	88.987	0.323	0.449
460	89.95	0.334	0.507
470	89.194	0.338	0.524
480	88.465	0.342	0.538
490	86.192	0.341	0.523
500	86.576	0.349	0.541
510	86.936	0.358	0.545
520	87.966	0.369	0.542
530	89.322	0.382	0.574
540	90.499	0.394	0.601
550	91.416	0.405	0.611
560	92.442	0.417	0.628
570	93.268	0.429	0.637
580	93.598	0.438	0.643
590	93.404	0.444	0.658
600	93.293	0.451	0.651
610	93.004	0.458	0.67
620	92.012	0.46	0.668
630	90.842	0.462	0.654
640	89.928	0.464	0.663
650	88.879	0.466	0.66
660	87.94	0.468	0.636
670	87.364	0.472	0.662
680	86.991	0.477	0.667
690	86.784	0.483	0.613
700	86.723	0.49	0.619
710	86.19	0.494	0.638
720	85.699	0.498	0.593
730	85.863	0.505	0.545
740	85.2	0.508	0.602
750	85.14	0.515	0.633
760	84.303	0.517	0.608
770	84.122	0.522	0.374
780	83.305	0.524	0.614
790	83.048	0.529	0.605
800	82.532	0.532	0.58
810	81.561	0.533	0.573
820	81.167	0.537	0.495
830	79.967	0.535	0.489
840	76.317	0.517	0.508
850	71.686	0.491	0.502
860	63.596	0.441	0.446
870	53.173	0.373	0.39
880	40.066	0.284	0.313
890	30.671	0.22	0.234
900	19.751	0.143	0.146
910	12.172	0.089	0.082
920	6.847	0.051	0.046
930	4.13	0.031	0.029
940	2.195	0.017	0.007
950	1.226	0.009	0.004
960	0	0	0.002
970	0	0	0
980	0	0	0
