# Supplementary material for: Improved efficiency and stability of outdoor and indoor organic photovoltaics with suppressed voltage loss via alkoxylation on dimeric giant acceptors featured as supramolecular stabilizers
Source: Royal Society of Chemistry journal article supplement (doi:10.1039/d5ee00668f), 2025-01-01
Supplement: d5ee00668f2.xlsx [file d5ee00668f2.xlsx]

## Sheet: PM6;BTP-eC9;DYO-V
PM6:BTP-eC9:DYO-V(1 sun)
[Volt (V)]	[Current (mA)]	[J (mA/cm^2)]
-0.5	-0.00167939	-28.4642
-0.49	-0.00167882	-28.4545
-0.48	-0.00167931	-28.4628
-0.47	-0.00167867	-28.4521
-0.46	-0.00167654	-28.416
-0.45	-0.00167517	-28.3928
-0.44	-0.00167378	-28.3691
-0.43	-0.00167434	-28.3787
-0.42	-0.00167441	-28.3799
-0.41	-0.00167428	-28.3776
-0.4	-0.0016747	-28.3847
-0.39	-0.00167423	-28.3769
-0.38	-0.00167556	-28.3993
-0.37	-0.00167373	-28.3683
-0.36	-0.00167434	-28.3786
-0.35	-0.00167359	-28.366
-0.34	-0.00167252	-28.3478
-0.33	-0.00167232	-28.3444
-0.32	-0.00167261	-28.3494
-0.31	-0.00167616	-28.4095
-0.3	-0.001676	-28.4068
-0.29	-0.00167551	-28.3985
-0.28	-0.00167315	-28.3585
-0.27	-0.00166971	-28.3001
-0.26	-0.00166879	-28.2845
-0.25	-0.00166674	-28.2498
-0.24	-0.00166606	-28.2383
-0.23	-0.00166417	-28.2062
-0.22	-0.0016634	-28.1933
-0.21	-0.00166392	-28.2021
-0.2	-0.00166462	-28.2139
-0.19	-0.00166578	-28.2336
-0.18	-0.0016665	-28.2458
-0.17	-0.00166829	-28.2762
-0.16	-0.0016677	-28.2661
-0.15	-0.0016687	-28.283
-0.14	-0.00166523	-28.2242
-0.13	-0.00166477	-28.2165
-0.12	-0.00166304	-28.1872
-0.11	-0.00166134	-28.1583
-0.1	-0.00166189	-28.1676
-0.09	-0.00166134	-28.1584
-0.08	-0.00166196	-28.1689
-0.07	-0.00166176	-28.1654
-0.06	-0.00166228	-28.1743
-0.05	-0.00166053	-28.1446
-0.04	-0.00165891	-28.1172
-0.03	-0.00165904	-28.1193
-0.02	-0.00165789	-28.0998
-0.01	-0.0016602	-28.139
0	-0.0016563	-28.0729
0.01	-0.00165495	-28.05
0.02	-0.00165624	-28.0719
0.03	-0.00165688	-28.0827
0.04	-0.00165822	-28.1055
0.05	-0.0016567	-28.0796
0.06	-0.00165827	-28.1063
0.07	-0.00165674	-28.0803
0.08	-0.00165626	-28.0722
0.09	-0.00165643	-28.0751
0.1	-0.00165518	-28.054
0.11	-0.00165606	-28.0688
0.12	-0.00165567	-28.0622
0.13	-0.00165635	-28.0738
0.14	-0.0016541	-28.0356
0.15	-0.00165456	-28.0434
0.16	-0.00165408	-28.0352
0.17	-0.00165412	-28.036
0.18	-0.00165486	-28.0484
0.19	-0.00165484	-28.0482
0.2	-0.00165623	-28.0716
0.21	-0.00165555	-28.0603
0.22	-0.00165355	-28.0263
0.23	-0.00165341	-28.0239
0.24	-0.00165315	-28.0195
0.25	-0.0016537	-28.0289
0.26	-0.00165233	-28.0056
0.27	-0.00165362	-28.0274
0.28	-0.0016508	-27.9797
0.29	-0.00165001	-27.9663
0.3	-0.00164939	-27.9558
0.31	-0.00164928	-27.9539
0.32	-0.00164963	-27.9599
0.33	-0.00164802	-27.9326
0.34	-0.00164905	-27.95
0.35	-0.00164695	-27.9143
0.36	-0.00164522	-27.8851
0.37	-0.001642	-27.8305
0.38	-0.00164232	-27.8359
0.39	-0.00164375	-27.8602
0.4	-0.00164385	-27.8618
0.41	-0.00164881	-27.946
0.42	-0.00164801	-27.9323
0.43	-0.00164637	-27.9045
0.44	-0.00164516	-27.8841
0.45	-0.00164488	-27.8793
0.46	-0.00164455	-27.8738
0.47	-0.00164531	-27.8866
0.48	-0.0016481	-27.9339
0.49	-0.00164823	-27.936
0.5	-0.00165091	-27.9815
0.51	-0.0016501	-27.9678
0.52	-0.00164949	-27.9575
0.53	-0.00165104	-27.9838
0.54	-0.00164757	-27.9248
0.55	-0.00164656	-27.9078
0.56	-0.00164344	-27.8548
0.57	-0.00164222	-27.8342
0.58	-0.0016417	-27.8254
0.59	-0.00164125	-27.8178
0.6	-0.00164186	-27.8282
0.61	-0.00163883	-27.7767
0.62	-0.00163706	-27.7468
0.63	-0.00163465	-27.7059
0.64	-0.00163336	-27.6841
0.65	-0.00163206	-27.662
0.66	-0.00163057	-27.6368
0.67	-0.00162904	-27.6109
0.68	-0.00162648	-27.5674
0.69	-0.00162432	-27.5309
0.7	-0.00161759	-27.4168
0.71	-0.00161251	-27.3307
0.72	-0.00160541	-27.2103
0.73	-0.00159816	-27.0875
0.74	-0.00159111	-26.9679
0.75	-0.00158064	-26.7906
0.76	-0.00156718	-26.5624
0.77	-0.00155016	-26.2739
0.78	-0.00152989	-25.9304
0.79	-0.00150207	-25.4588
0.8	-0.00146907	-24.8994
0.81	-0.00142787	-24.2011
0.82	-0.00137237	-23.2605
0.83	-0.0013023	-22.0728
0.84	-0.00120607	-20.4419
0.85	-0.00108521	-18.3934
0.86	-0.000932839	-15.8108
0.87	-0.000743038	-12.5939
0.88	-0.000509129	-8.62931
0.89	-0.000225565	-3.82313
0.9	0.000103276	1.75044
0.91	0.000491095	8.32365
0.92	0.000925866	15.6926
0.93	0.00140983	23.8955
0.94	0.00193801	32.8477
0.95	0.00250887	42.5232
0.96	0.00311866	52.8586
0.97	0.00376286	63.7773
0.98	0.00443813	75.2226
0.99	0.00514165	87.1466
1	0.00587408	99.5606

## Sheet: PM6;DYO-V (indoor condition)
PM6:DYO-V(indoor condition, 2600K LED under 2000 lux)
[Volt (V)]	[Current (mA)]	[J (mA/cm^2)]
-0.5	-1.58179e-05	-0.2681
-0.48	-1.58179e-05	-0.2681
-0.46	-1.58179e-05	-0.2681
-0.44	-1.58179e-05	-0.2681
-0.42	-1.58179e-05	-0.2681
-0.4	-1.58179e-05	-0.2681
-0.38	-1.58179e-05	-0.2681
-0.36	-1.58179e-05	-0.2681
-0.34	-1.58179e-05	-0.2681
-0.32	-1.58179e-05	-0.2681
-0.3	-1.58179e-05	-0.2681
-0.28	-1.58179e-05	-0.2681
-0.26	-1.58179e-05	-0.2681
-0.24	-1.58179e-05	-0.2681
-0.22	-1.58179e-05	-0.2681
-0.2	-1.58179e-05	-0.2681
-0.18	-1.58037e-05	-0.26786
-0.16	-1.57902e-05	-0.26763
-0.14	-1.57766e-05	-0.2674
-0.12	-1.57624e-05	-0.26716
-0.1	-1.57483e-05	-0.26692
-0.08	-1.57341e-05	-0.26668
-0.06	-1.57194e-05	-0.26643
-0.04	-1.57046e-05	-0.26618
-0.02	-1.56893e-05	-0.26592
0	-1.56739e-05	-0.26566
0.02	-1.5658e-05	-0.26539
0.04	-1.56421e-05	-0.26512
0.06	-1.5625e-05	-0.26483
0.08	-1.56085e-05	-0.26455
0.1	-1.55907e-05	-0.26425
0.12	-1.55731e-05	-0.26395
0.14	-1.55548e-05	-0.26364
0.16	-1.55365e-05	-0.26333
0.18	-1.5517e-05	-0.263
0.2	-1.54969e-05	-0.26266
0.22	-1.54769e-05	-0.26232
0.24	-1.54556e-05	-0.26196
0.26	-1.54332e-05	-0.26158
0.28	-1.54108e-05	-0.2612
0.3	-1.53872e-05	-0.2608
0.32	-1.5363e-05	-0.26039
0.34	-1.53412e-05	-0.26002
0.36	-1.53146e-05	-0.25957
0.38	-1.52893e-05	-0.25914
0.4	-1.52604e-05	-0.25865
0.42	-1.52297e-05	-0.25813
0.44	-1.51943e-05	-0.25753
0.46	-1.51606e-05	-0.25696
0.48	-1.51229e-05	-0.25632
0.5	-1.50839e-05	-0.25566
0.52	-1.50438e-05	-0.25498
0.54	-1.50002e-05	-0.25424
0.56	-1.4953e-05	-0.25344
0.58	-1.4901e-05	-0.25256
0.6	-1.48456e-05	-0.25162
0.62	-1.47825e-05	-0.25055
0.64	-1.47116e-05	-0.24935
0.66	-1.46308e-05	-0.24798
0.68	-1.45482e-05	-0.24658
0.7	-1.44355e-05	-0.24467
0.72	-1.42975e-05	-0.24233
0.74	-1.41217e-05	-0.23935
0.76	-1.38874e-05	-0.23538
0.78	-1.35476e-05	-0.22962
0.8	-1.30661e-05	-0.22146
0.82	-1.23251e-05	-0.2089
0.84	-1.11221e-05	-0.18851
0.86	-9.09367e-06	-0.15413
0.88	-5.60028e-06	-0.09492
0.9	6.0357e-07	0.01023
0.92	1.16077e-05	0.19674
0.94	3.11662e-05	0.52824
0.96	6.50864e-05	1.10316
0.98	0.000121519	2.05964
1	0.000210341	3.5651
1.02	0.000342187	5.79978
1.04	0.000526766	8.92824
1.06	0.000771239	13.0718
1.08	0.00107953	18.2971
1.1	0.00145213	24.6124
1.12	0.00188684	31.9804
1.14	0.0023795	40.3305
1.16	0.00292562	49.5868
1.18	0.00347633	58.9208
1.2	0.00411943	69.8209
